# Supplementary figures and images for: Inhibition of yeast telomerase action by the telomeric ssDNA-binding protein, Cdc13p
Source: PubMed Central journal article supplement — Nucleic Acids Res. 2008 Nov 29;37(2):354–67. doi: 10.1093/nar/gkn830 (PMC2632905; doi:10.1093/nar/gkn830), 2008-11-29

Supplementary Figure 1 (Wuttke and Zappulla)

a

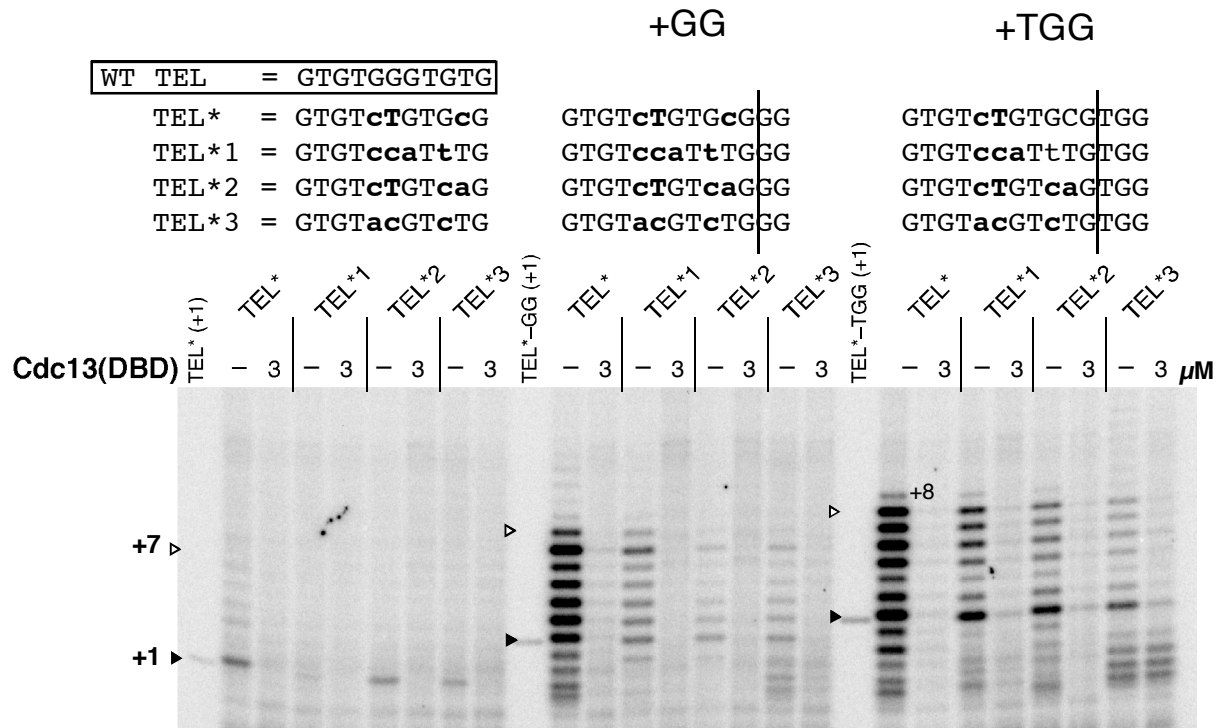

b

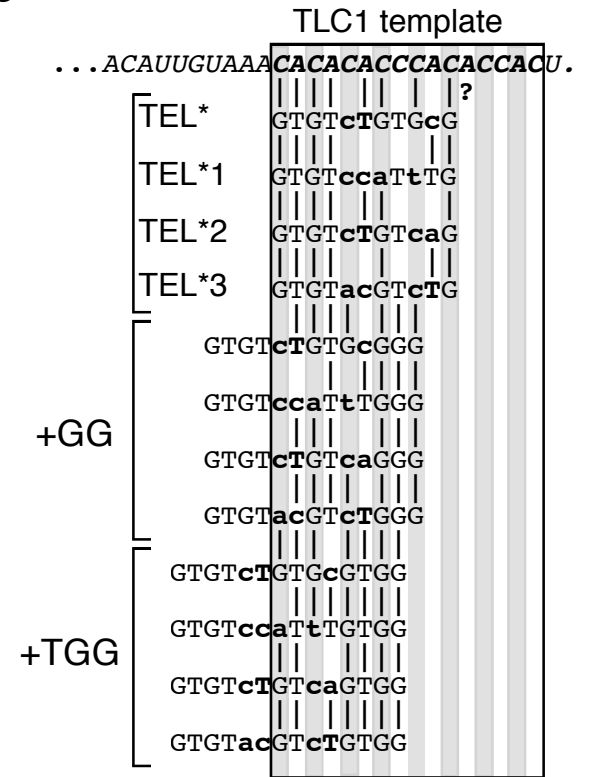

Supplementary Figure 2 (Wuttke and Zappulla)

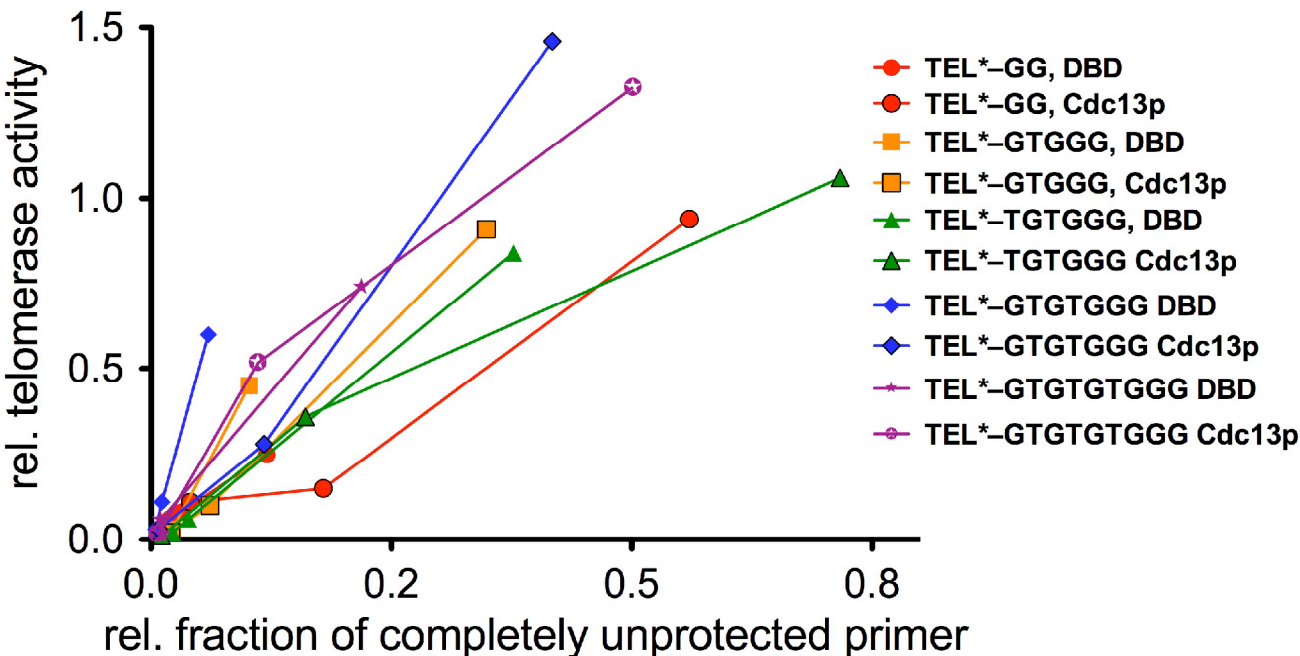

Supplement: gkn830_2.pdf [file gkn830_2.pdf]
